# Supplementary material
Source: PubMed Central journal article supplement (PMC3208052)

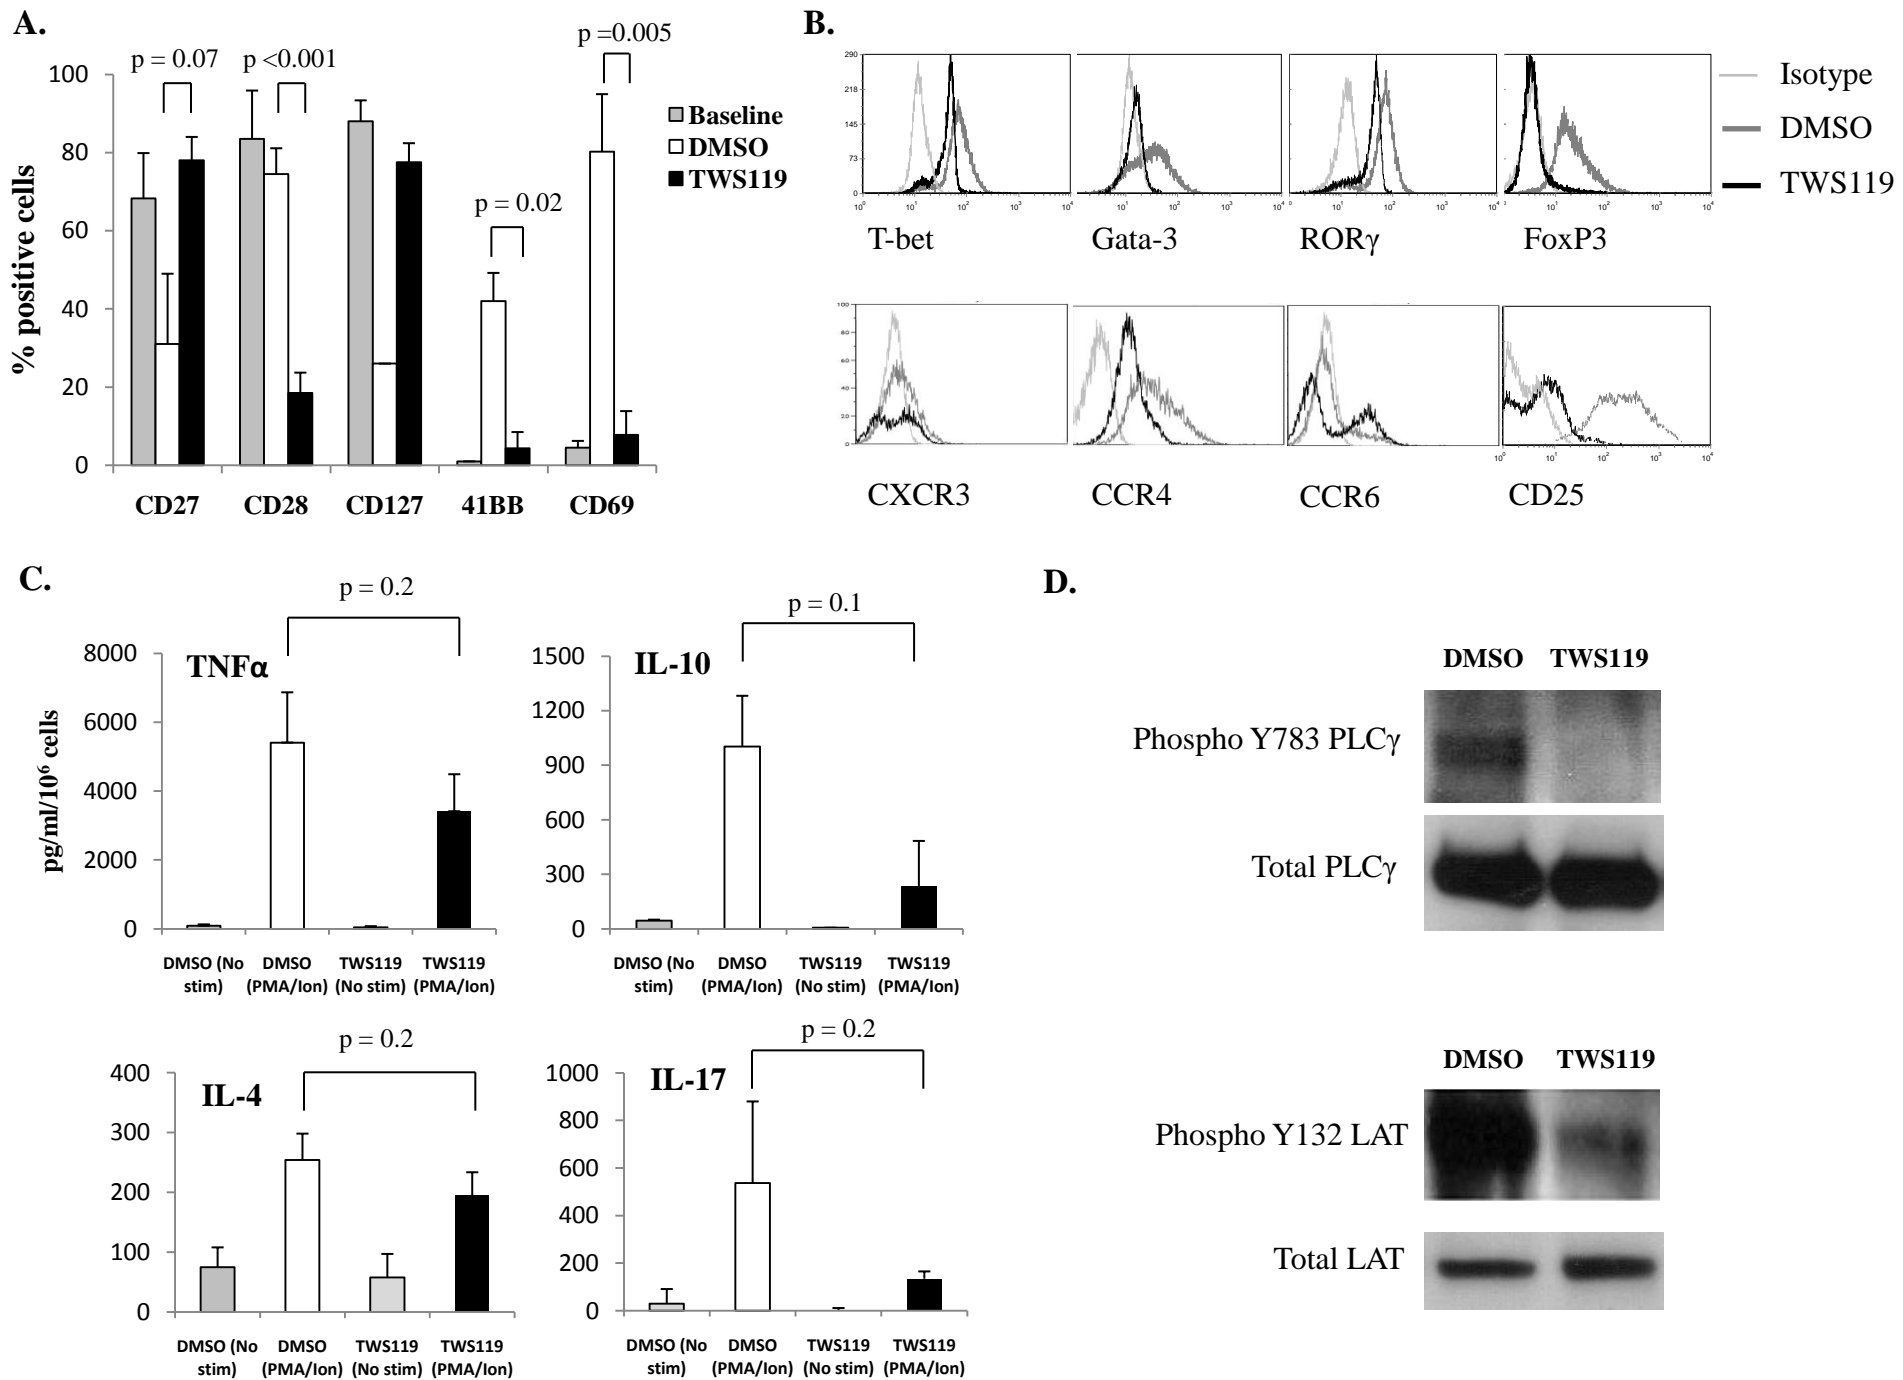

Suppl. Figure 1

Supplement: NIHMS325941-supplement-2.pdf [file NIHMS325941-supplement-2.pdf]

**A.**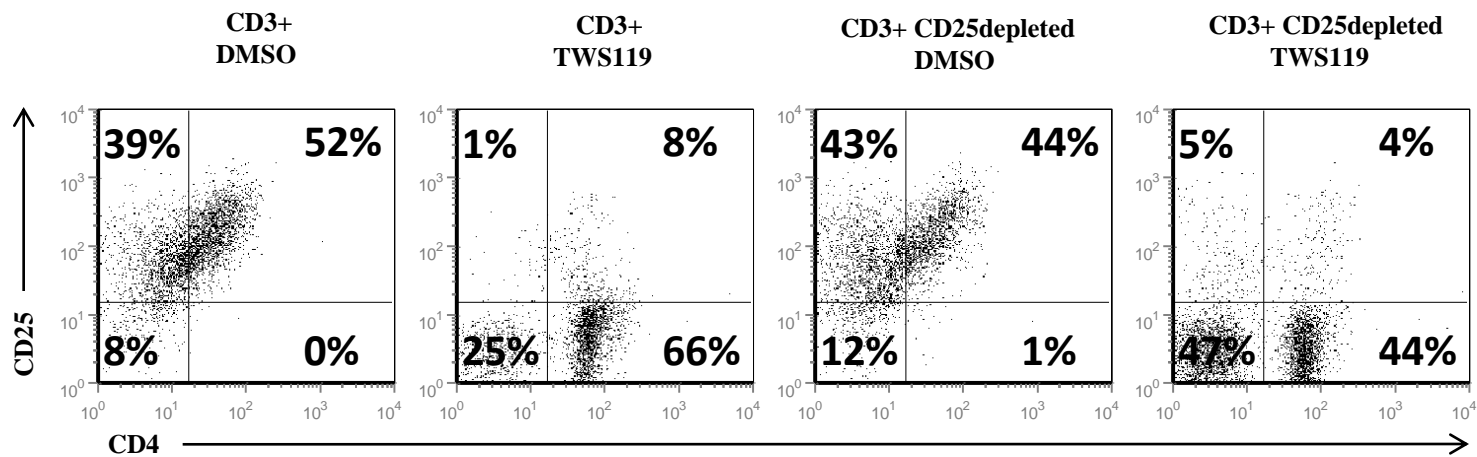**B.**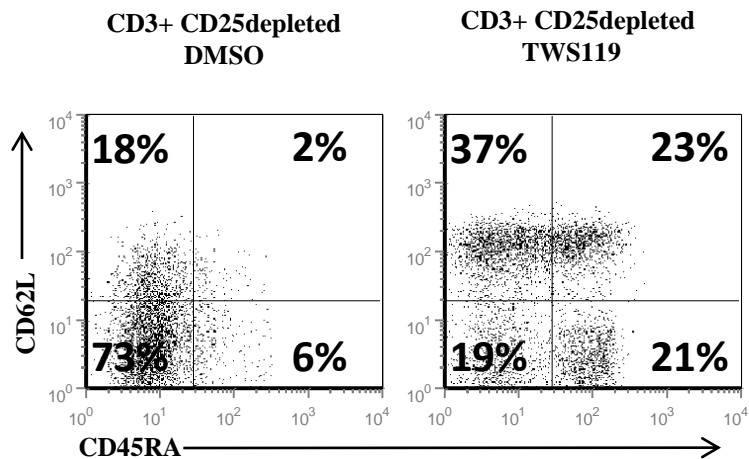**C.**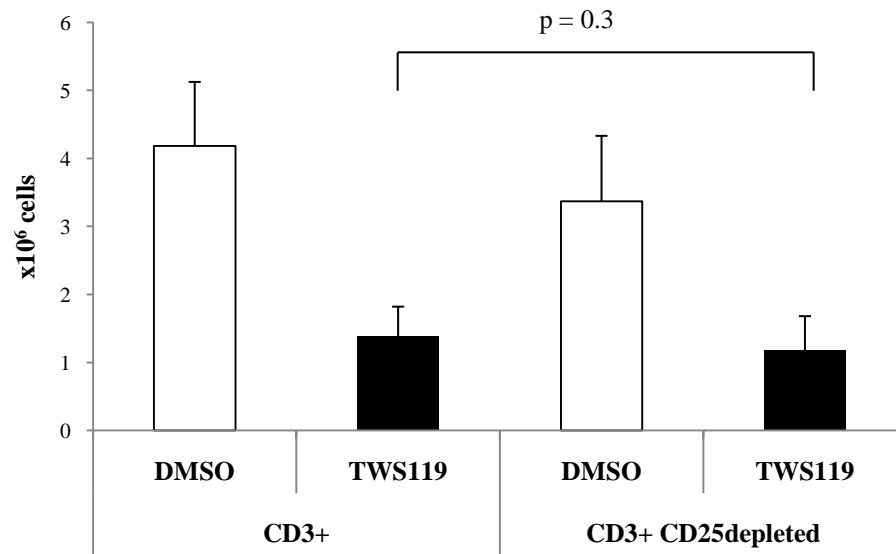

Supplement: NIHMS325941-supplement-3.pdf [file NIHMS325941-supplement-3.pdf]

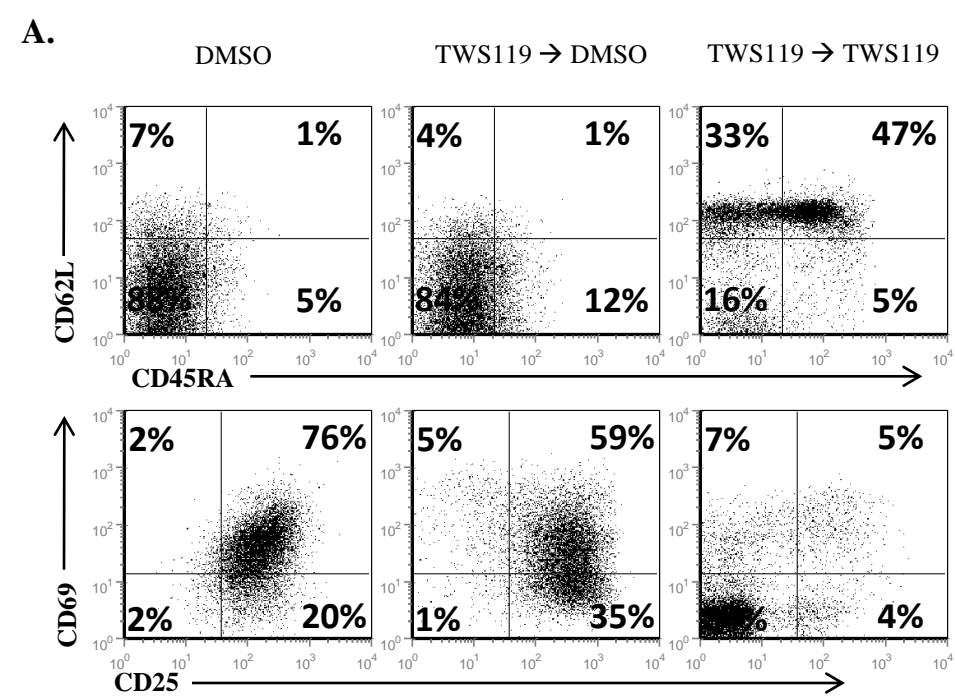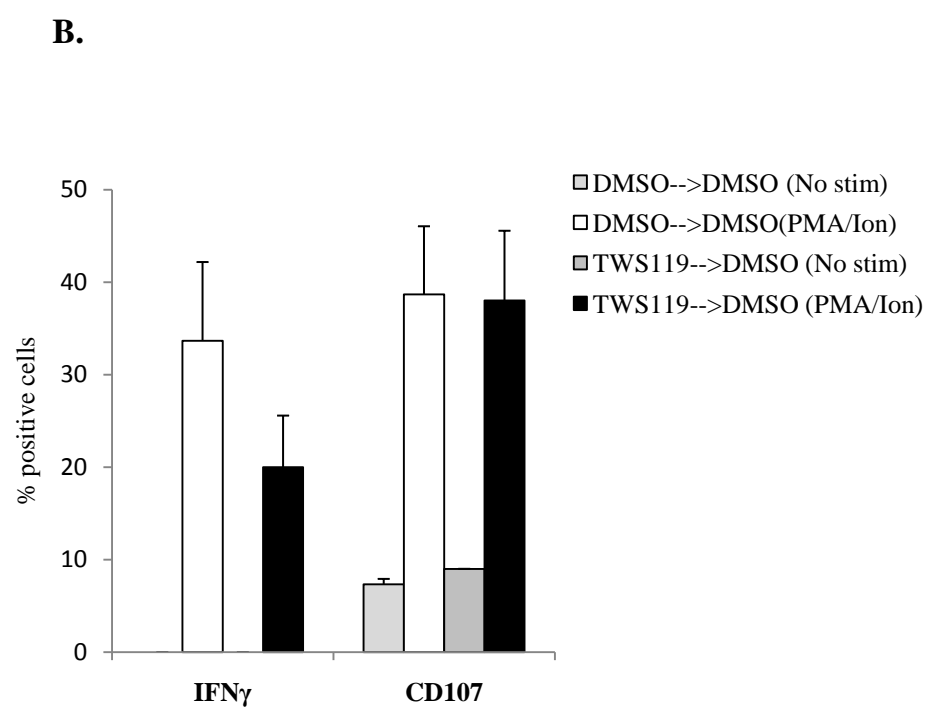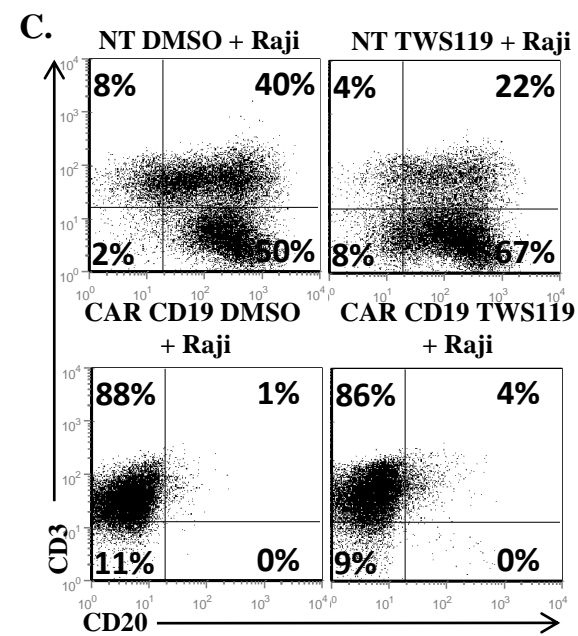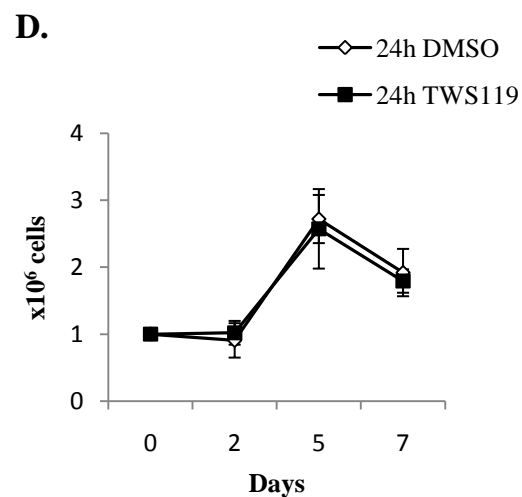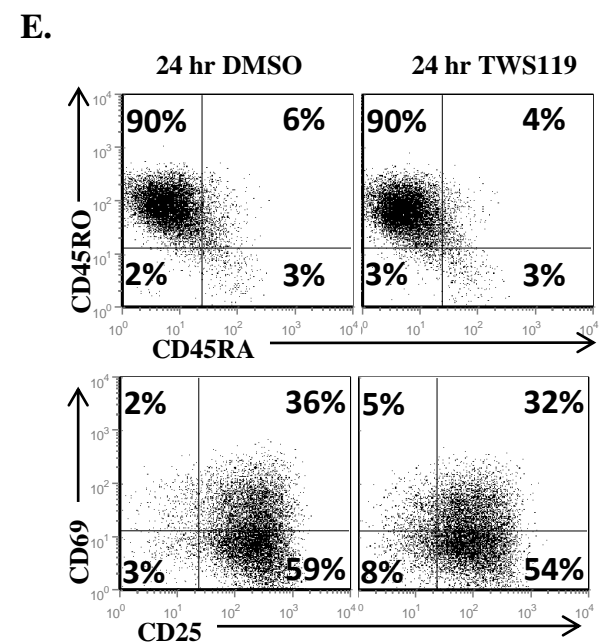

Supplement: NIHMS325941-supplement-4.pdf [file NIHMS325941-supplement-4.pdf]
